# Supplementary material for: The Sister Chromatid Division of the Heteromorphic Sex Chromosomes in Silene Species and Their Transmissibility towards the Mitosis
Source: MDPI journal article supplement (doi:10.3390/ijms23052422), 2022-02-22
Supplement: s1 [file s1]

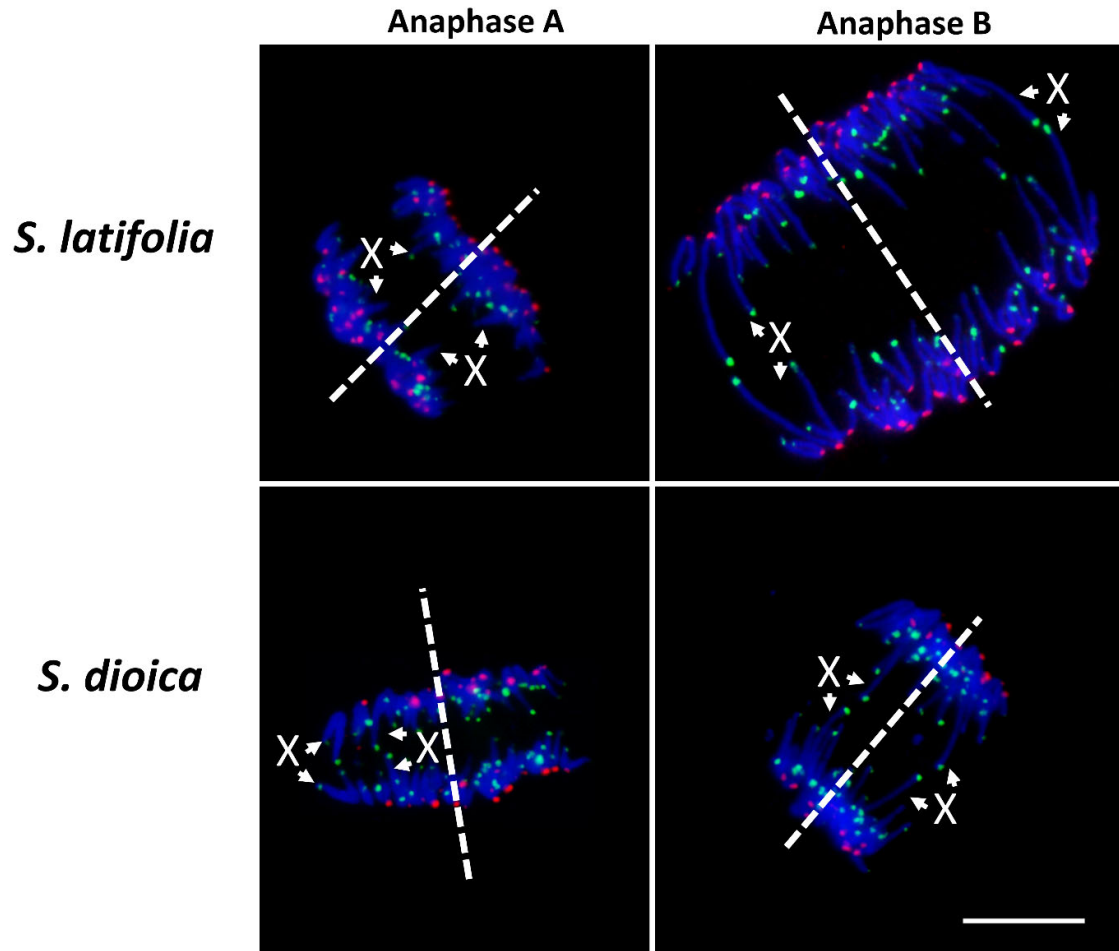

**Figure S2** – Mitotic cell division in *S. latifolia* and *S. dioica* female individuals. Subtelomeric satellite X43.1 (green) probe was used as a marker for Y q-arm chromosomes and STAR-C (red) as a marker for primary constriction in *S. latifolia*, *S. dioica* and *S. vulgaris*. Chromosomes were counterstained with DAPI (blue). Note the position of the sex chromosomes (marked by arrows) and their distance from the central interpolar axis (dash lines). Scale bar = 10  $\mu$ m
