# Supplementary material for: The Sister Chromatid Division of the Heteromorphic Sex Chromosomes in Silene Species and Their Transmissibility towards the Mitosis
Source: MDPI journal article supplement (doi:10.3390/ijms23052422), 2022-02-22
Supplement: s1 [file s1]

**Table S1** – The position of the largest chromosome in anaphase-telophase transition

| Species             | chromatids at the edge |       | chromatids close to central interpolar axis |       |
|---------------------|------------------------|-------|---------------------------------------------|-------|
|                     | Y (%)                  | X (%) | Y (%)                                       | X (%) |
| <i>S. latifolia</i> | 54.29                  | 34.29 | 45.71                                       | 65.71 |
| <i>S. dioica</i>    | 68.42                  | 65.79 | 31.58                                       | 34.21 |

**Table S2** – The length of the spindle axis during anaphase A, anaphase B and telophase in studied species

| Species             | anaphase A (μm) | +/-  | anaphase B (μm) | +/-  | Telophase (μm) | +/-  |
|---------------------|-----------------|------|-----------------|------|----------------|------|
| <i>S. latifolia</i> | 7.39            | 0.59 | 15.39           | 2.74 | 21.98          | 1.71 |
| <i>S. dioica</i>    | 7.29            | 1.88 | 15.33           | 2.11 | 24.03          | 2.07 |
| <i>S. vulgaris</i>  | 7.66            | 0.82 | 11.24           | 0.84 | 15.37          | 1.01 |

**Table S3** – The X and Y chromosome arm length during anaphase A, anaphase B and telophase in studied species

| Species             |     | anaphase A (μm) | +/-      | anaphase B (μm) | +/-      | Telophase (μm) | +/-      |
|---------------------|-----|-----------------|----------|-----------------|----------|----------------|----------|
| <i>S. latifolia</i> | Y q | 5.59            | 0.6<br>9 | 7.19            | 1.0<br>0 | 7.74           | 1.6<br>6 |
|                     | Y p | 4.46            | 0.3<br>5 | 5.55            | 0.7<br>6 | 5.86           | 1.8<br>1 |
| <i>S. dioica</i>    | Y q | 6.46            | 1.7<br>4 | 7.14            | 1.2<br>8 | 8.63           | 1.5<br>3 |
|                     | Y p | 4.52            | 1.4<br>4 | 5.58            | 1.4<br>4 | 6.04           | 1.6<br>2 |

**Table S4** – The comparison of chromosomal arm length and predicted arm limit size for the longest arm in studied dioecious plants during telophase

| Species             | Length of longest arm (μm/Mb) <sup>a</sup> | +<br>/<br>- | Length of the spindle axis in telophase (μm) <sup>b</sup> | +<br>/<br>- | Predicted upper limit for the longest arm extension (μm/Mb) <sup>c</sup> |
|---------------------|--------------------------------------------|-------------|-----------------------------------------------------------|-------------|--------------------------------------------------------------------------|
| <i>S. latifolia</i> | 7.74 (327.3 Mb)                            | 1.66        | 21.98                                                     | 1.71        | 10.99 (464.7 Mb)                                                         |
| <i>S. dioica</i>    | 8.63 (301.2 Mb)                            | 1.53        | 24.03                                                     | 2.07        | 12.02 (419.6 Mb)                                                         |

<sup>a</sup> the length estimated from the average longest arm chromosomal length in telophase<sup>b</sup> the length estimated from the most two distal points (centromere) in telophase<sup>c</sup> the length estimated = the length of the spindle axis in telophase/2

\*the length of the X chromosome

**Table S5** – The genome and the sex chromosome size according to their chromosomal length

| Species                          | Genome size (Mb) <sup>b</sup> | 2n     | Y (%) <sup>c</sup> | +/- | Y (Mb) | +/-   | X (%) <sup>c</sup> | +/- | X (Mb) | +/-  |
|----------------------------------|-------------------------------|--------|--------------------|-----|--------|-------|--------------------|-----|--------|------|
| <i>S. latifolia</i> <sup>a</sup> | 5535.5                        | 24, XY | 10.4               | 1.9 | 575.1  | 106.8 | 7.2                | 1.1 | 397.9  | 62.8 |
| <i>S. dioica</i> <sup>a</sup>    | 5398.6                        | 24, XY | 9.5                | 1.4 | 512.0  | 77.4  | 6.4                | 0.4 | 346.7  | 20.3 |

<sup>a</sup>– the size of the *S. vulgaris* genome = 2210.3 Mb

<sup>b</sup>– genome size estimated from 2C (pg) Kew mean value (\*978Mb)

<sup>c</sup>– relative size (%) of the sex chromosome estimated from the average sex chromosome length in c-metaphase (μm)/whole genome length (μm), 10 cells counted

**Table S6** – Plant material

| Species                 | Population       | No. of chromosomes | The biggest chromosome | Origin                 |
|-------------------------|------------------|--------------------|------------------------|------------------------|
| <i>Silene latifolia</i> | U16*             | 24, XY             | Y                      | Bačovský et al. 2020** |
| <i>Silene dioica</i>    | Tišnov           | 24, XY             | Y                      |                        |
| <i>Silene vulgaris</i>  | Čertovica (CERT) | 24                 |                        |                        |

\*population made by 16 generations of full-sib mating

\*\* Bačovský V, Čegan R, Šimoníková D, et al (2020) The Formation of Sex Chromosomes in *Silene latifolia* and *S. dioica* Was Accompanied by Multiple Chromosomal Rearrangements . Front. Plant Sci. 11:205
